# Supplementary material
Source: publisher figshare collection journal article supplement (https://karger.figshare.com/articles/dataset/_/5124700)
Supplement: Supplementary file 1 [file 1]

# **Nuclear distribution of Bs in fibroblast nuclei depending on their number in cell**

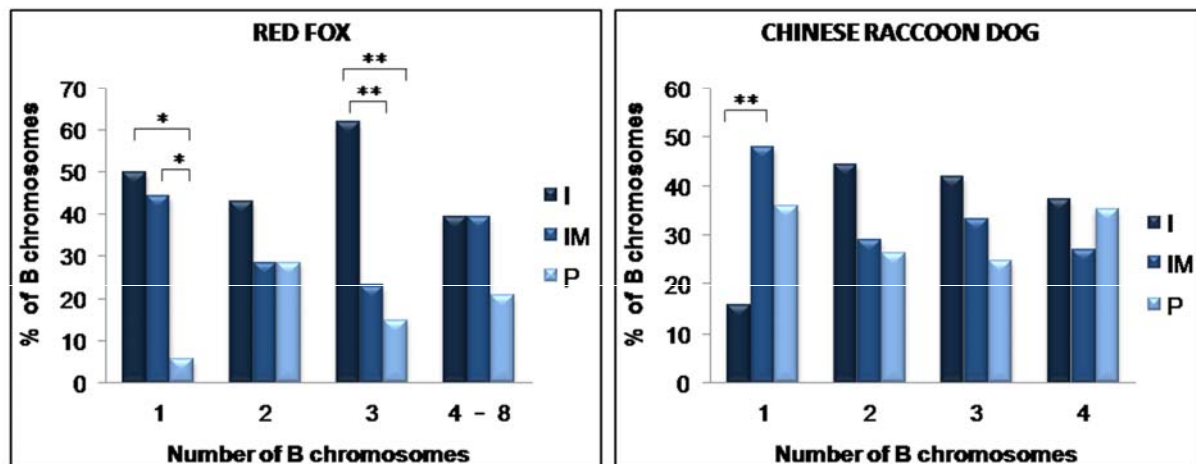

**Suppl. Fig. 1.** Spatial distribution (P, peripheral; I, interior; IM, intermediate) of B chromosomes in fibroblast interphase nuclei of the red fox (left) and the Chinese raccoon dog (right) depending on the number of Bs. Statistical comparisons between the location of B chromosomes in peripheral, intermediate and interior areas of the nucleus were performed using the chi-square test with Yates's correction and are indicated by asterisks (\*  $p < 0.05$ ; \*\*  $p < 0.001$ ).
