# Supplementary material
Source: publisher figshare collection journal article supplement (https://karger.figshare.com/articles/dataset/_/5124700)
Supplement: Supplementary file 2 [file 1 › 000348434_sm_Table.pdf]

**Table S1.** Results of the chi-square test with Yates's correction for comparisons between the location of B chromosomes in peripheral, intermediate and interior areas of the nucleus. P-values considered significant are indicated by asterisks (\*  $p < 0.05$ ; \*\*  $p < 0.001$ ).

| comparison | RED FOX      |             | CHINESE RACCOON DOG |              |
|------------|--------------|-------------|---------------------|--------------|
|            | Bs           | VVU 2       | Bs                  | NPP 6        |
| I - IM     | 0.0009905 ** | 0.5862137   | 0.2371402           | 0.0347628 *  |
| I - P      | 0.0000001 ** | 0.0071036 * | 0.0629648           | 0.0007099 ** |
| IM - P     | 0.0218101 *  | 0.0399318 * | 0.4958682           | 0.1897835    |
